# Supplementary material for: SIRT7 inactivation reverses metastatic phenotypes in epithelial and mesenchymal tumors
Source: PubMed Central journal article supplement (PMC4413894; doi:10.1038/srep09841), 2015-04-29

## Supplementary Information

### **SIRT7 inactivation reverses metastatic phenotypes in epithelial and mesenchymal tumors**

Shivani Malik<sup>1,2,8\*</sup>, Lidia Villanova<sup>1,2,3,9\*</sup>, Shinji Tanaka<sup>4</sup>, Misato Aonuma<sup>5</sup>, Nilotpal Roy<sup>6</sup>, Elisabeth Berber<sup>1,2</sup>, Jonathan R. Pollack<sup>7</sup>, Eriko Michishita-Kioi<sup>4</sup>, Katrin F. Chua<sup>1,2</sup>

<sup>1</sup> Department of Medicine, Division of Endocrinology, Gerontology and Metabolism, School of Medicine, Stanford University, Stanford, California 94305, USA,

<sup>2</sup> Geriatric Research, Education, and Clinical Center, VA Palo Alto Health Care System, Palo Alto, California 94304, USA,

<sup>3</sup> Department of Experimental Medicine, Sapienza University, Rome, Italy,

<sup>4</sup> Venture Science Laboratories, Daiichi Sankyo Co. Ltd., 1-2-58 Hiromachi, Tokyo 140-8710, Japan,

<sup>5</sup> Biological Research Department, Daiichi Sankyo RD Novare Co., Ltd., 1-16-13, Kitakasai, Tokyo 134-8630,

<sup>6</sup> Diabetes Center, University of California, San Francisco, San Francisco, California 94143

<sup>7</sup> Department of Pathology, Stanford University, Stanford, California 94305, USA

<sup>8</sup> Present Address: Department of Medicine, UCSF School of Medicine, San Francisco CA 94158

<sup>9</sup> Present address: Department of Hematology, Oncology and Molecular Medicine, Istituto Superiore di Sanita, Rome, Italy

\*These authors contributed equally to this work

Correspondence and requests for materials should be addressed to K.F.C. (kfchua@stanford.edu) or E.M.-K. (kioi.eriko.ur@daiichisankyo.co.jp)

# Supplementary Figure 1. Full length blots for data in Figure 2A,E,G

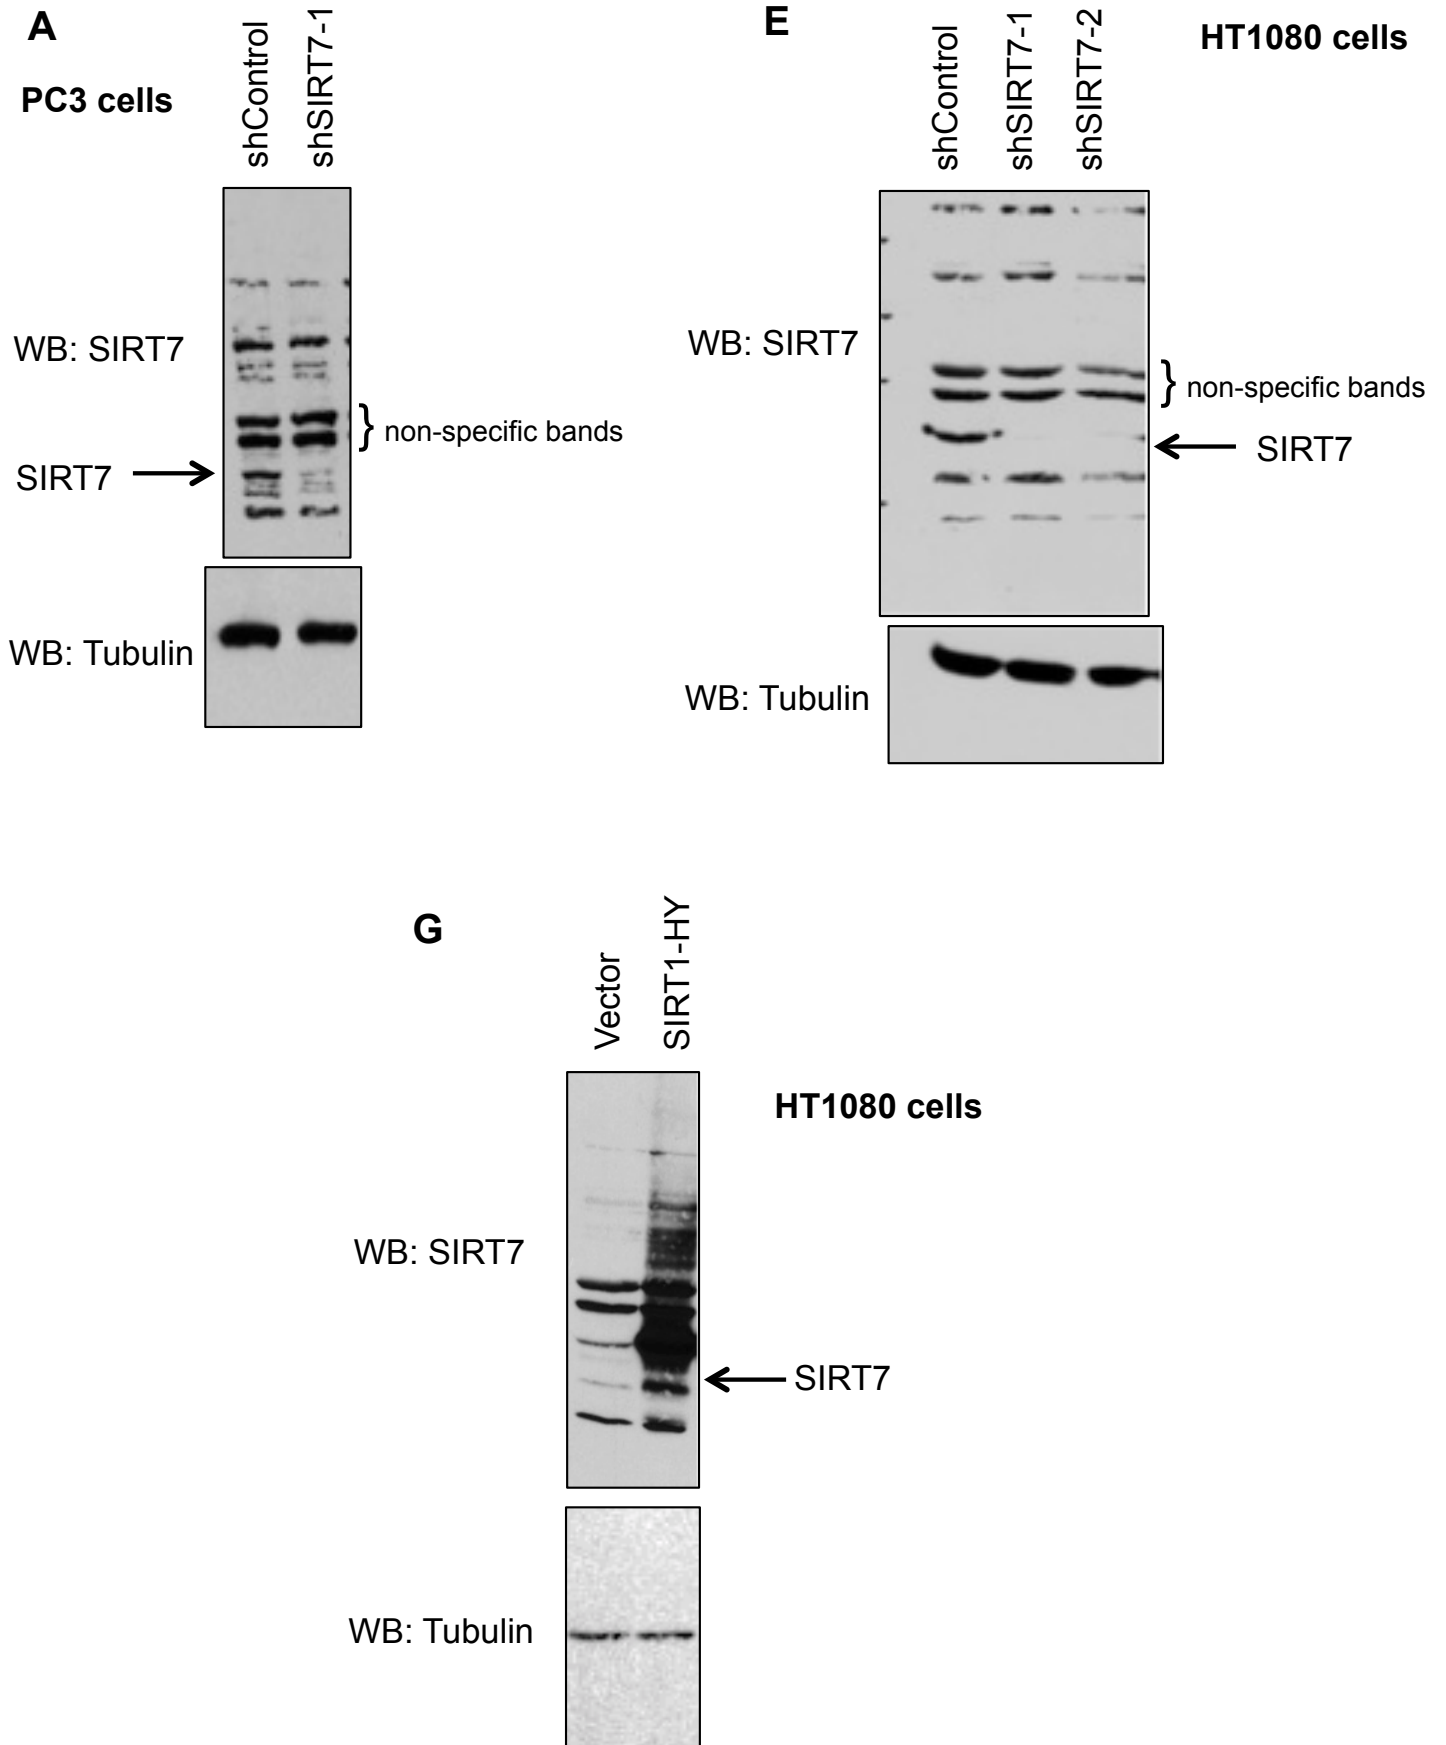

## Supplementary Figure 2. Full length blots for data in Figure 3A

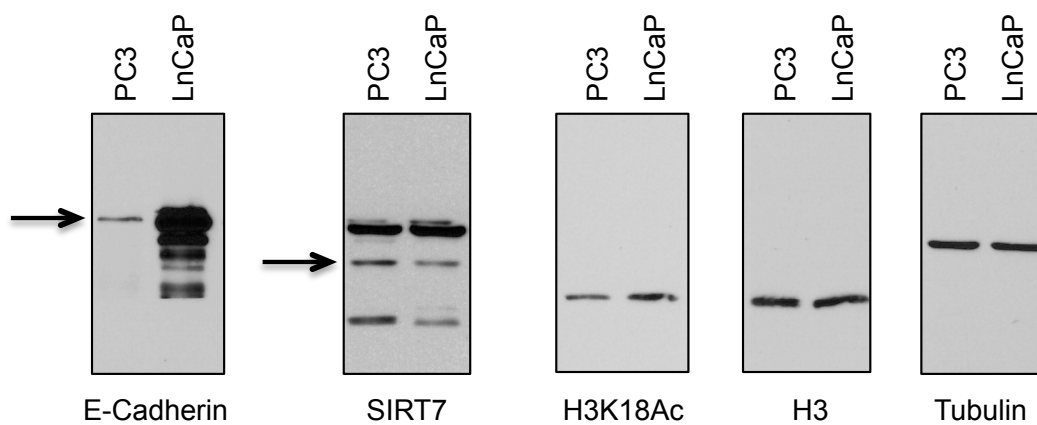

### Supplementary Figure 3. Full length blots for data in Figure 4A

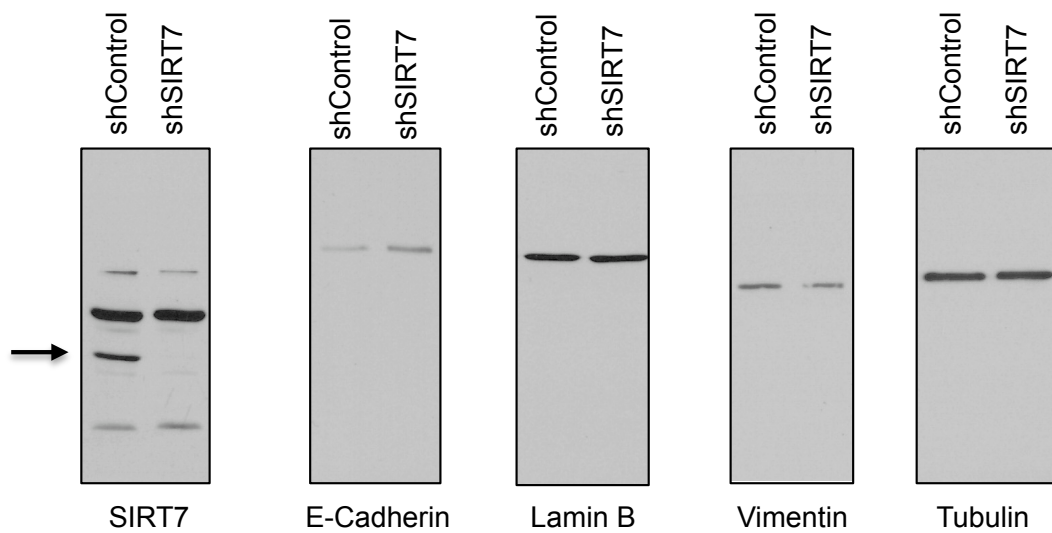

**Supplementary Figure 4. Full blots for data in Figure 5A, B, C, E**

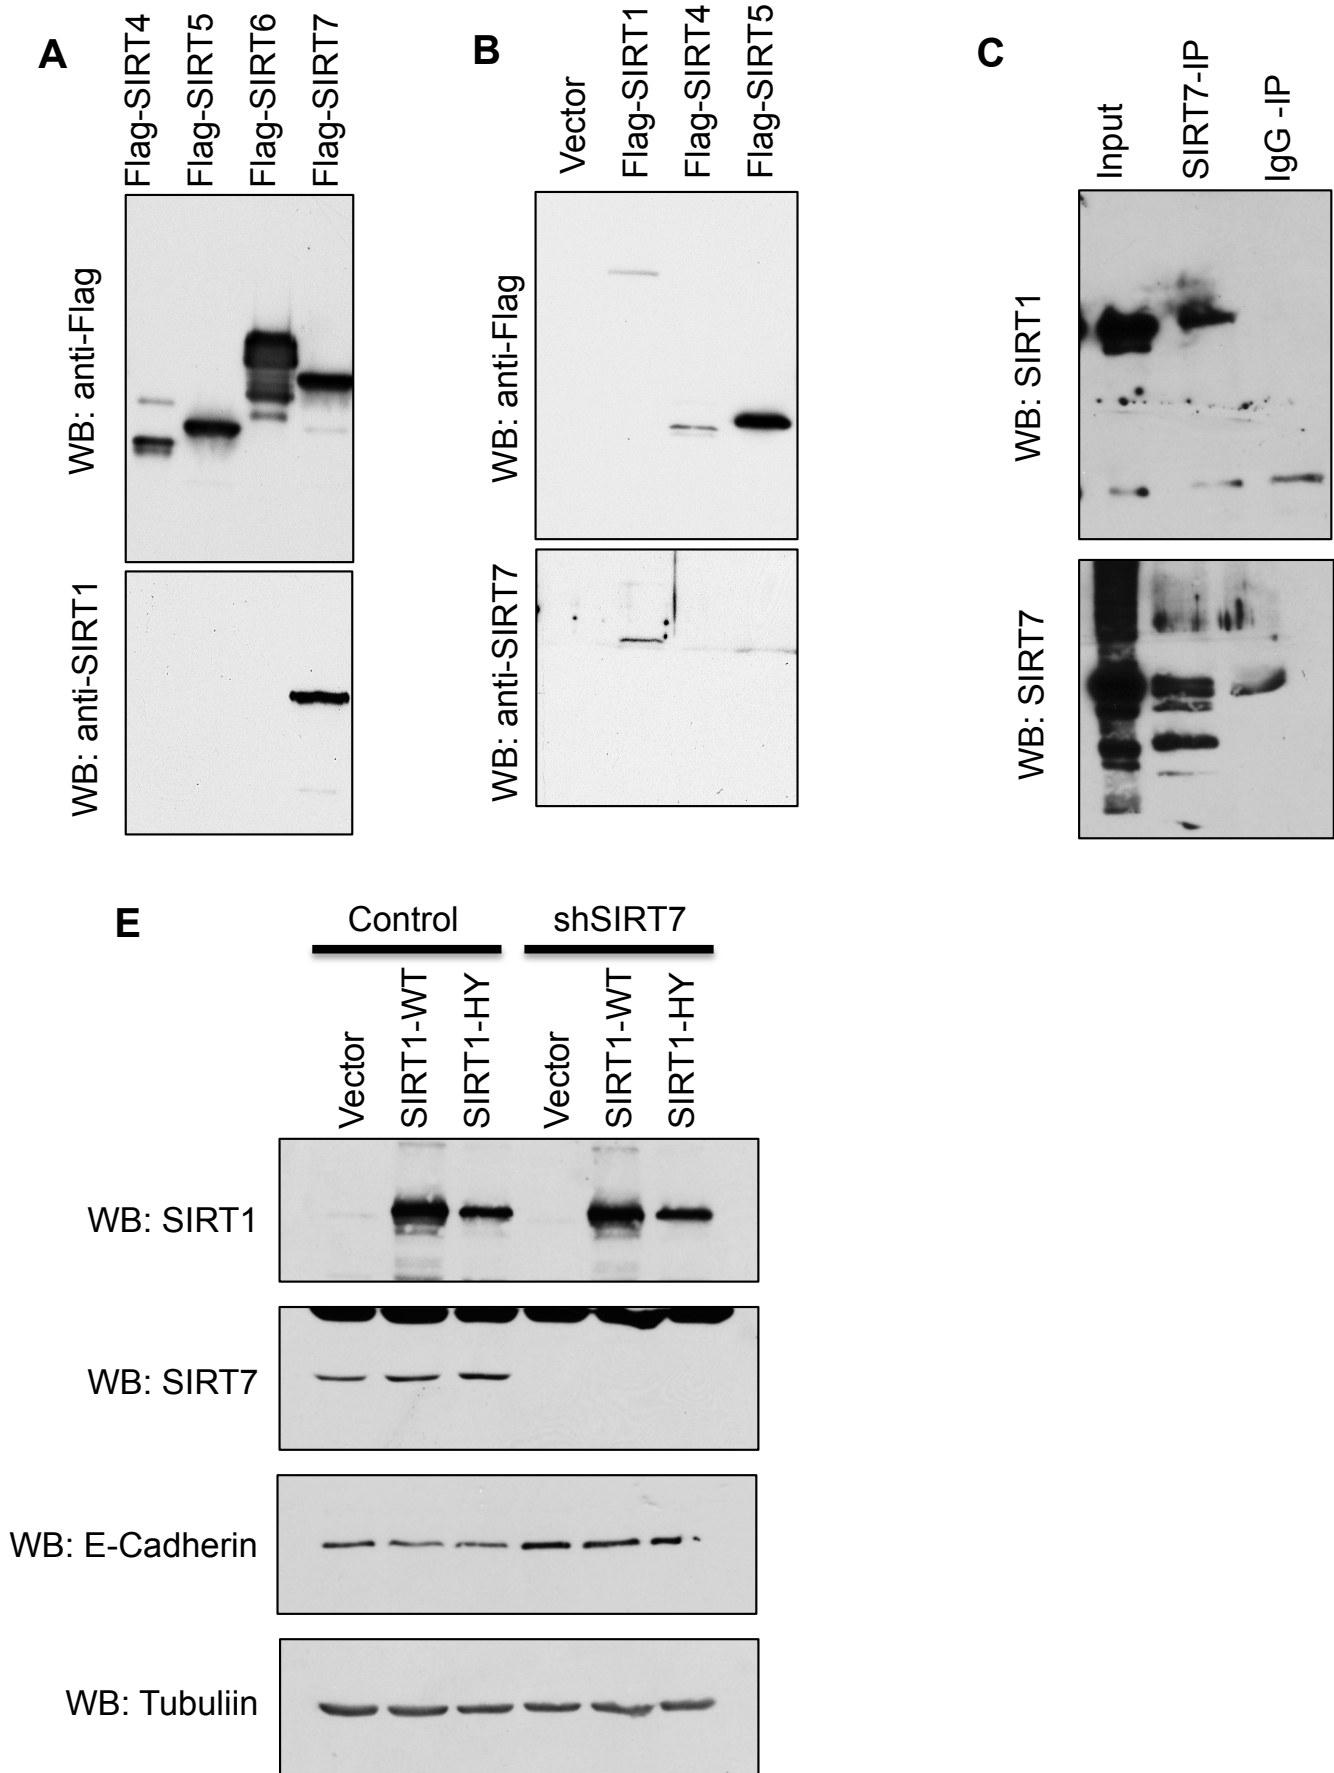

Supplementary Figure 5. Full blots for data in Figure 5F

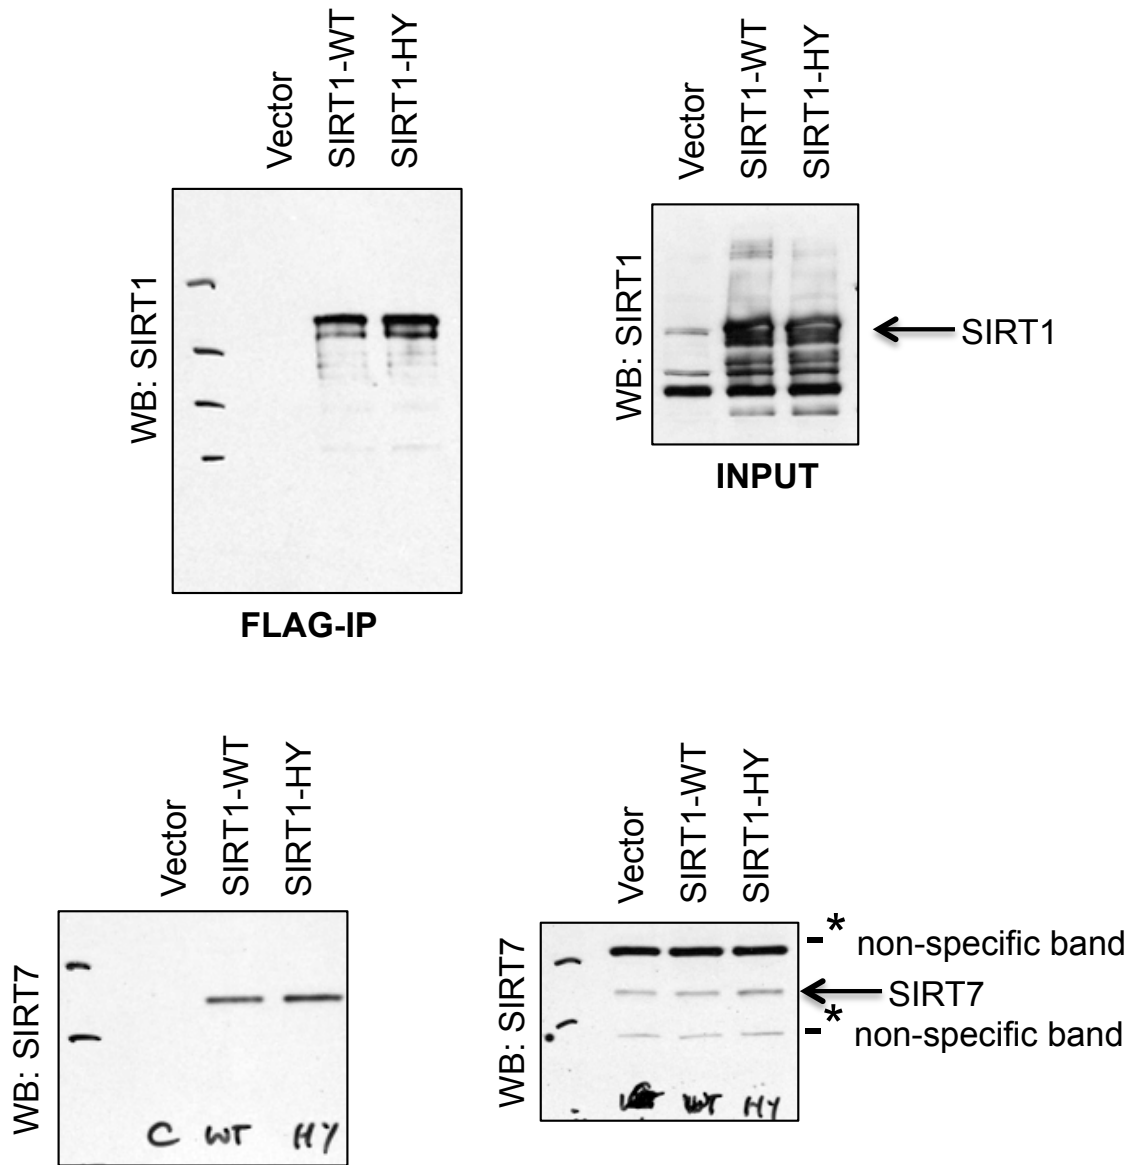

Supplementary Figure 6. Full blot for data in Figure 6.

A

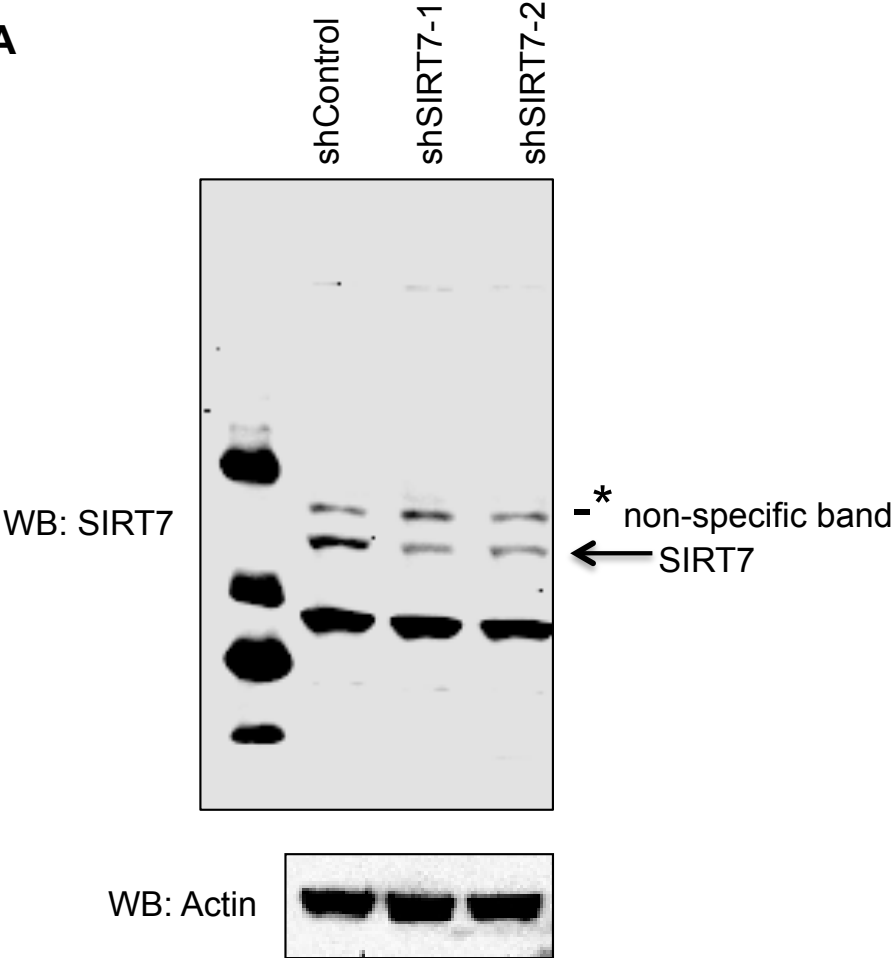

Supplement: srep09841-s1.pdf [file srep09841-s1.pdf]
